# Supplementary material for: In situ atomically dispersed Fe doped metal-organic framework on reduced graphene oxide as bifunctional electrocatalyst for Zn–air batteries
Source: Royal Society of Chemistry journal article supplement (doi:10.1039/d1tc02729h), 2021-01-01
Supplement: d1tc02729h1.pdf [file d1tc02729h1.pdf]

## Supporting Information.

### **In-situ Atomically Dispersed Fe Doped Metal-Organic Framework on Reduced Graphene Oxide as Bifunctional Electrocatalyst for Zn-Air Batteries**

Xiaolin Zhao<sup>a,b,c,d†\*</sup>, Lin Shao<sup>a,f†</sup>, Ziming Wang<sup>d</sup>, Huibing Chen<sup>a,f</sup>, Haipeng Yang<sup>e\*</sup>  
and Lin Zeng<sup>a,f\*</sup>

<sup>a</sup> Department of Mechanical and Energy Engineering, Southern University of Science and Technology, Shenzhen 518055, China

<sup>b</sup> Shenzhen Automotive Research Institute, Beijing Institute of Technology, Shenzhen 518118, Guangdong, China

<sup>c</sup> National Engineering Laboratory for Electric Vehicles, Beijing Institute of Technology, Beijing 100081, Beijing, China

<sup>d</sup> Department of Chemical and Biological Engineering, University at Buffalo, The State University of New York, Buffalo, New York 14260, United States

<sup>e</sup> College of Materials Science and Engineering, Shenzhen Key Laboratory of Polymer Science and Technology, Shenzhen University, Shenzhen, 518060, China

<sup>f</sup> Guangdong Provincial Key Laboratory of Energy Materials for Electric Power, Southern University of Science and Technology, Shenzhen 518055, China

**†These authors contributed equally:** Xiaolin Zhao, Lin Shao

**\* Corresponding Authors:**

E-mail addresses:

zhaoxiaolin@szari.ac.cn, yanghp@szu.edu.cn, zengl3@sustech.edu.cn

**Figures S1 to S6;**

**Table S1-S6**

## **2.Experimental Section**

### **Catalysts synthesis**

#### **Graphene oxide (GO) synthesis**

GO was prepared from natural graphite powder by using a modified Hummers' method.<sup>[1-4]</sup> Firstly, graphite powder (2 g) and NaNO<sub>3</sub> (1 g) were mixed with concentrated H<sub>2</sub>SO<sub>4</sub> (46 mL) in an ice bath for 15-20 min. KMnO<sub>4</sub> (6 g) was added gradually under vigorous stirring to prevent rapid reaction temperature rise, which was kept the temperature lower than 20°C. The ice bath was removed, and the mixture was stirred at 35°C for 2 h. At the end, deionized water (92 mL) was slowly added to the mixture, while maintaining stirring at 98°C for 15 min. Then, the deionized water (280 mL) and H<sub>2</sub>O<sub>2</sub> (10 mL) were added to the solution, and the color turned yellow. The mixture was left overnight. The mixture was washed by 5% HCl and the deionized water for many times, up to the PH=7. As-prepared GO was further dispersed by ultrasonication treatment for 1 h, and finally the GO was obtained by freeze drying (-45°C) for 48 h.

#### **Reduced graphene oxide (rGO) synthesis**

The synthesized graphite oxide (0.2 g)<sup>[5, 6]</sup> was dispersed into deionized water by

sonication for 1 h to obtain the uniform brown-yellow graphene oxide solution (2 mg/ml). The pH of the solution was adjusted to 8.5 by slowly adding  $\text{NH}_3 \cdot \text{H}_2\text{O}$ . Then, hydrazine hydrate (2 ml) was added into the solution for 4 h at 80°C. The suspension was filtered, and washed with ultrapure water and methanol. The rGO was obtained by drying in oven at 30°C for 24 h.

### **Fe-ZIF-8/rGO catalyst synthesis**

The rGO powder was first dispersed into methanol (75 mL) by sonication for 30 min. 24 mmol 2-methylimidazole was dissolved in other methanol (75 mL). Then, 5.5 mmol  $\text{Zn}(\text{NO}_3)_2 \cdot 6\text{H}_2\text{O}$  and 0.1 mmol  $\text{Fe}(\text{NO}_3)_3 \cdot 9\text{H}_2\text{O}$  were added into the rGO solution with vigorous agitation. After 30 min, the 2-methylimidazole solution was added into the above mixture with stirring for 30 min. At last, the solution was heated at 60°C for 24 h. The precipitant was collected by centrifugation and washed with ethanol at least three times. After drying at 60°C in a vacuum oven, Fe-ZIF-8/rGO precursor was prepared, and denoted as Fe-ZIF-8/nrGO (n was weight ratio (rGO: Fe-ZIF-8), which were 1, 2, 3, 4). The pure Fe-ZIF-8 was synthesized by the same process, just no adding rGO. The different sizes of Fe-ZIF-8 particle were prepared by previous reports.<sup>[7, 8]</sup> The precursor was calcined at temperature range from 800 to 1100 °C under  $\text{N}_2$  flow for 1 h. After carbonization, the catalysts were named as Fe-N-C/nrGO.

### **Physical characterization:**

The surface morphology and microstructure of the samples were investigated with

scanning electron microscopy (SEM, Model JSM-6510A, Japan). Transmission electron microscopy (TEM) was performed on a JEOL JEM-2100 high-resolution transmission electron microscopes at 200 kV. The crystal phases present in each sample were identified using powder X-ray diffraction (XRD) on a Rigaku Ultima IV diffractometer with Cu K- $\alpha$  X-rays. X-ray photoelectron spectroscopy (XPS) was performed by using a Microlab 350 (Thermo Fisher Scientific). The N<sub>2</sub> adsorption/desorption isothermal was recorded on Micromeritics ASAP 2020. Raman spectroscopy was performed by Raman Microscope with a 532 nm excitation laser. Inductively coupled plasma (ICP) spectroscopy was conducted on a Dual-view Optima 5300 DV ICP-OEM system. The high angle annular dark-field scanning TEM (HAADF-STEM) were performed on a probe-corrected FEI Titan 80-300 S/TEM.

#### **Electrochemical measurements:**

The electrochemical measurements were measured by an electrochemical workstation (CHI760e) in a three-electrode cell for oxygen reduction reaction (ORR)/oxygen evolution reaction (OER) tests. A graphite rod as the counter electrode, a rotating-ring disc electrode as the working electrode, a reversible hydrogen electrode (RHE) was as the reference electrode. Each catalyst was mixed with isopropanol and a 5wt% Nafion solution to produce an ink. The catalyst loading of the samples was  $\sim 255 \mu\text{g cm}^{-2}$ . For comparison, the commercial Pt/C catalyst (20 wt %) was also prepared with a loading mass of  $\sim 30 \mu\text{g}_{\text{Pt}} \text{ cm}^{-2}$ . The loading amount of the IrO<sub>2</sub> on RDE was determined to be  $0.2 \text{ mg/cm}^2$ .

All the cyclic voltammetry (CV), ORR polarization curves and four-electron selectivity were recorded in N<sub>2</sub> or O<sub>2</sub>- saturated 0.1M KOH at 50 mV s<sup>-1</sup> for 30 cycles.

For ORR measurement: The linear sweeping voltammetry (LSV) was conducted at various rotation rates from 500 to 2500 rpm with a sweep rate of 5 mV·s<sup>-1</sup> in O<sub>2</sub> or N<sub>2</sub>-saturated 0.1 M KOH solution. The ORR current was calculated by deduction of the background capacitive current measured in Ar-saturated 0.1 M KOH solution.

The electron transfer number (*n*) of ORR is calculated by the K-L equation as follows [9]:

$$1/J = 1/J_k + 1/J_L = 1/J_k + 1/(B\omega^{1/2})$$

$$B = 0.2nFD^{2/3}\nu^{-1/6}C$$

$$J_k = nFkC$$

where *J* is the measured current density, *J<sub>L</sub>* and *J<sub>k</sub>* are the diffusion-limiting current density and the kinetic current density, where *n* is the electron transferred number, *F* is the Faraday constant(96500 C·mol<sup>-1</sup>), *ω* is the angular velocity (rpm), *D* is the diffusion coefficient of O<sub>2</sub> in 0.1 M KOH (1.9×10<sup>-5</sup> cm<sup>2</sup>·s<sup>-1</sup>), *C* is the saturated concentration of O<sub>2</sub> in 0.1 M KOH at room temperature (1.2×10<sup>-6</sup>mol·cm<sup>-3</sup>), *ν* is the viscosity of the electrolyte (0.01cm<sup>2</sup>·s<sup>-1</sup>), and *k* is the electron transfer rate constant.

For OER measurements: The LSV curves were performed by using RDE in 0.1 M KOH or 1M KOH at a scan rate of 5 mV s<sup>-1</sup> under 1600rpm. The electrochemical active surface area of the samples was obtained by the double-layer capacitance (Cdl)

using the CV method in non-Faradaic window. The CV curves were obtained at scan rate of 5, 10, 15, 20, 25, and 30 mV s<sup>-1</sup>.

Tafel slopes were obtained by fitting the linear regions of Tafel plots to the Tafel equation ( $\eta = b \log |j| + a$ , where  $b$  is the Tafel slope,  $j$  is the current density).

The durability test was carried out at a static overpotential for 10 h, during which the current variation with time was recorded.

**Zn-air Battery assembly:** The Zn-air battery tests were performed with a homemade Zn-air cell. The catalyst with a loading of 1.0 mg cm<sup>-2</sup> was coated on a porous carbon paper was coated on a porous carbon paper (with a geometric area of 1 cm<sup>2</sup>). A polished zinc plate was used as the anode. The waterproof and breathable membrane was used as the gas diffusion layer. 6 M KOH + 0.2 M Zn(CH<sub>3</sub>COO)<sub>2</sub> solution was used as the electrolyte. The polarization curves were recorded by linear sweep voltammetry with a sweep rate of 10 mV s<sup>-1</sup>. All Zn-air batteries were tested under the same experimental conditions.



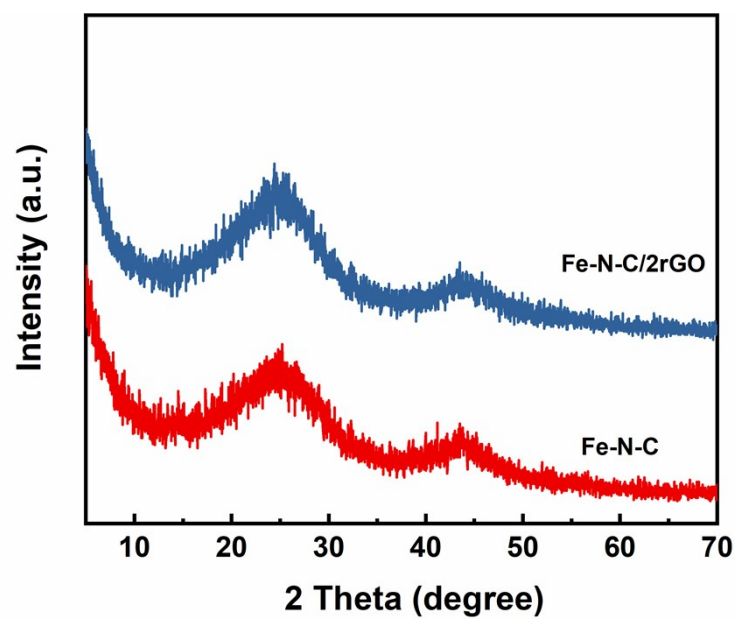

**Figure S1.** XRD patterns for the catalysts obtained after single heat-treatment at 1100 °C .



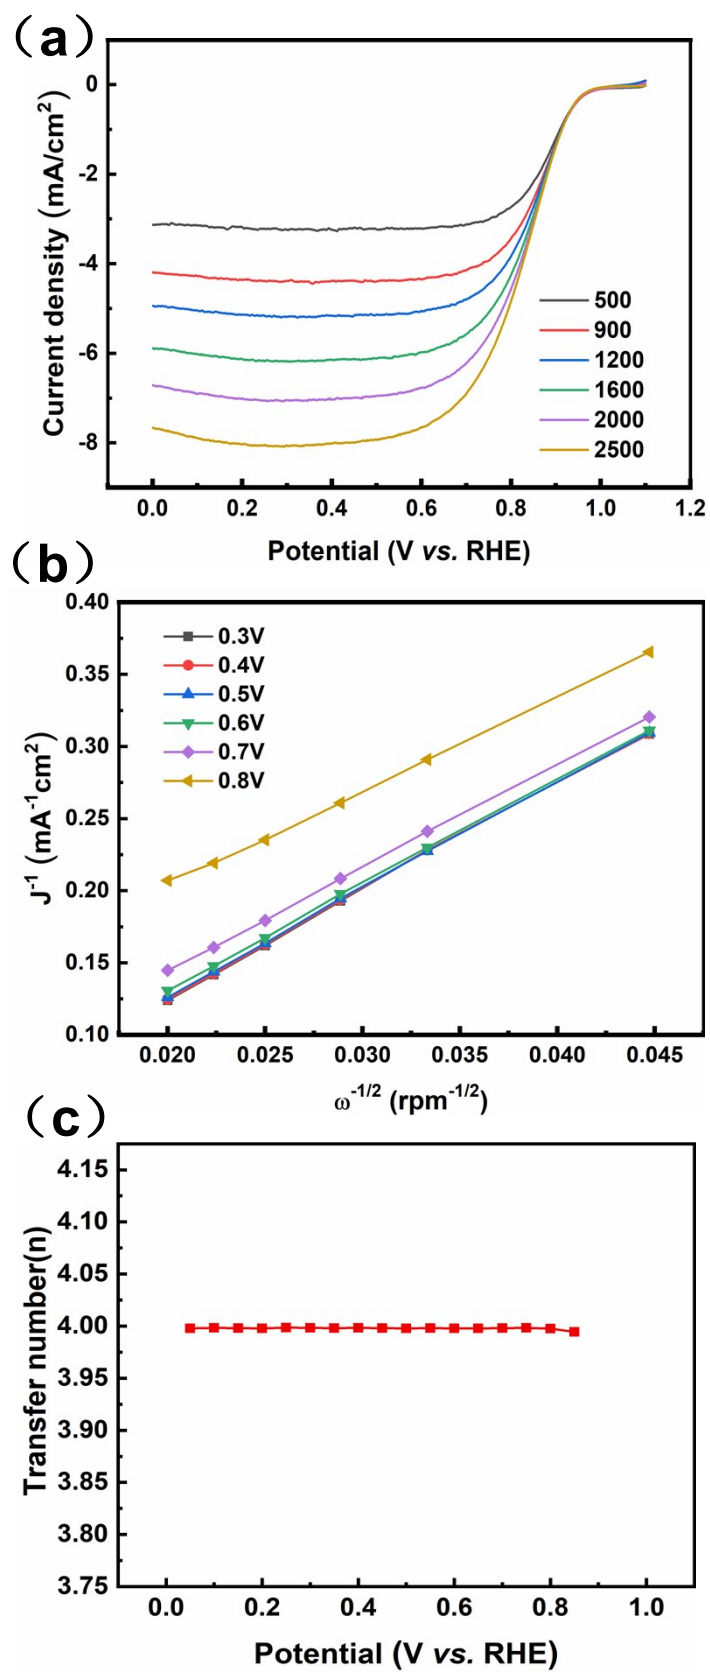

**Figure S2.** (a) The ORR kinetics of the Fe-N-C/2rGO catalyst were further analyzed by rotating disk measurement; (b) The corresponding Koutecky-Levich plots at different potentials; (c) The electron transfer number

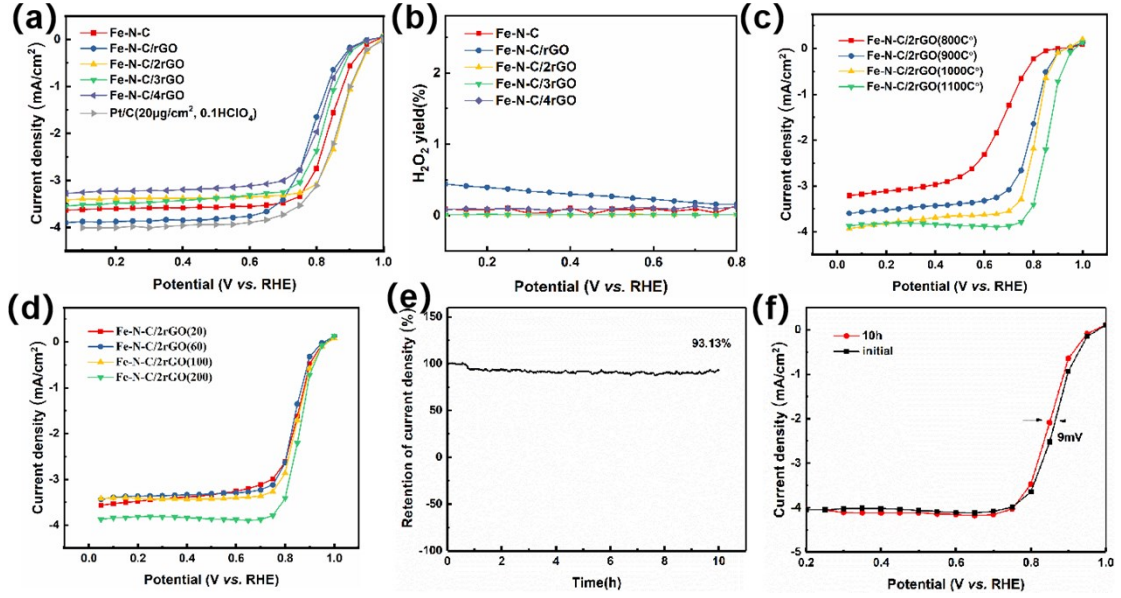

**Figure S3.** (a) ORR polarization plots and (b) H<sub>2</sub>O<sub>2</sub>% of all the catalysts; (c) ORR polarization plots of the catalysts synthesized at various temperatures; (d) the in-situ different sizes of the Fe-N-C catalysts; (e) 10h chronoamperometry tests at constant potentials of 0.85V; (f) ORR polarization plots after 10h. Test conditions: O<sub>2</sub>-saturated 0.5 M H<sub>2</sub>SO<sub>4</sub>, 900 rpm, 25°C, catalyst loading of 0.6 mg cm<sup>-2</sup>.

The hydrogen peroxide yield was calculated from the recorded ring ( $I_r$ ) and disk current ( $I_d$ ) using the following equation where  $N = 0.36$  is collection efficiency H<sub>2</sub>O<sub>2</sub> yield (%) =  $200I_r / (I_r + NI_d)$

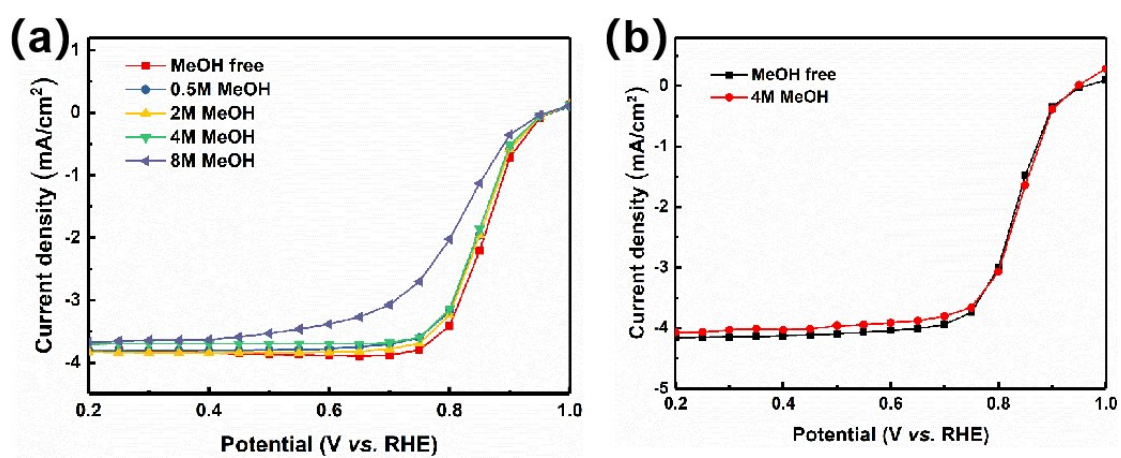

**Figure S4.** ORR polarization plots of the Fe-N-C/2rGO catalyst in  $O_2$ -saturated 0.5 M  $H_2SO_4$  aqueous solution with a rotating rate of 900 rpm (a) containing different methanol concentrations (b) only 4M methanol concentration



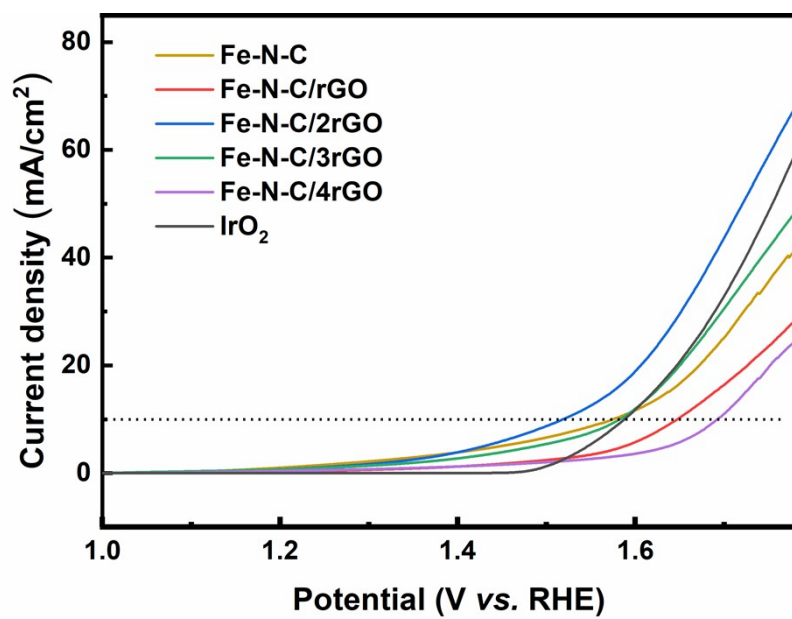

**Figure S5.** The OER polarization curves of all the catalysts; Test conditions: O<sub>2</sub>-saturated 0.1 M KOH, 1600 rpm, 25°C, catalyst loading of 0.255 mg cm<sup>-2</sup>

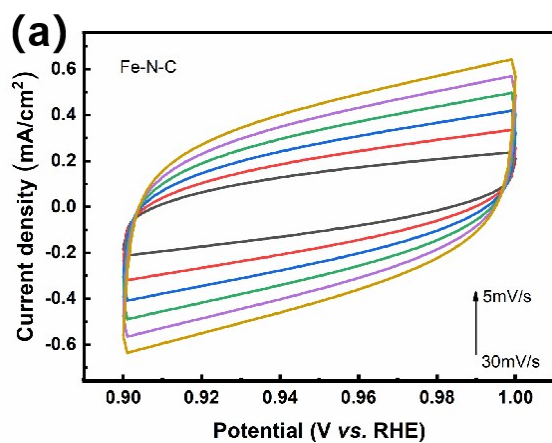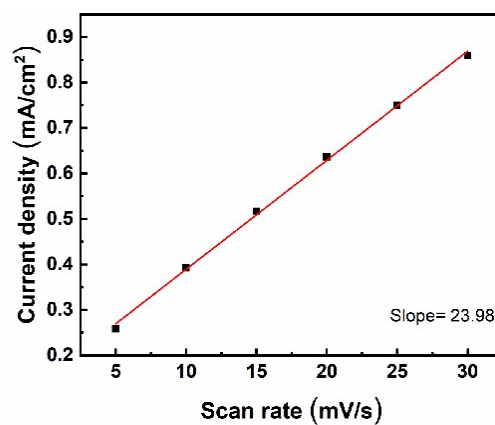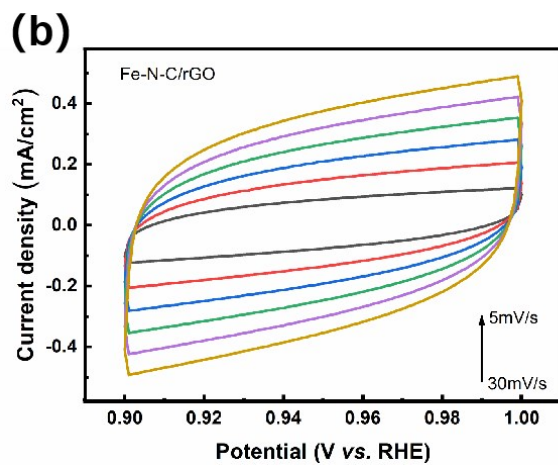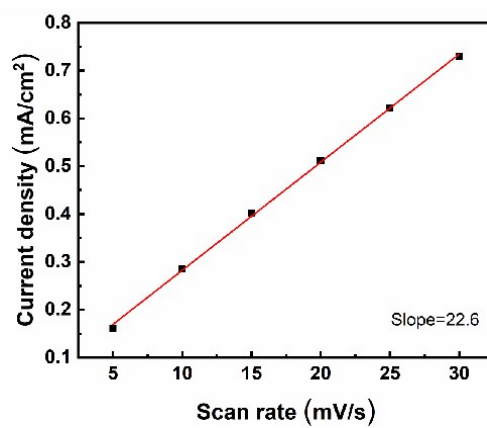

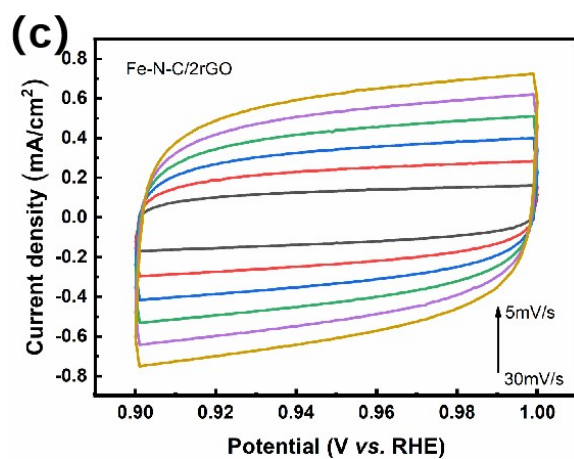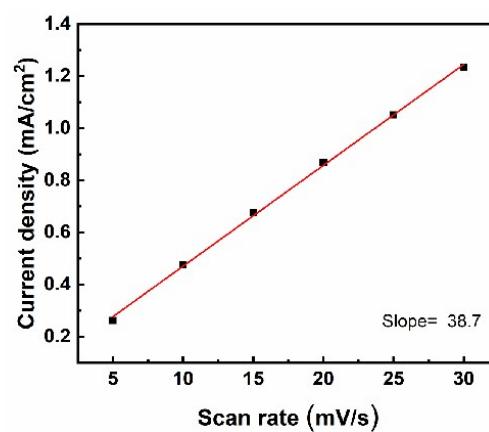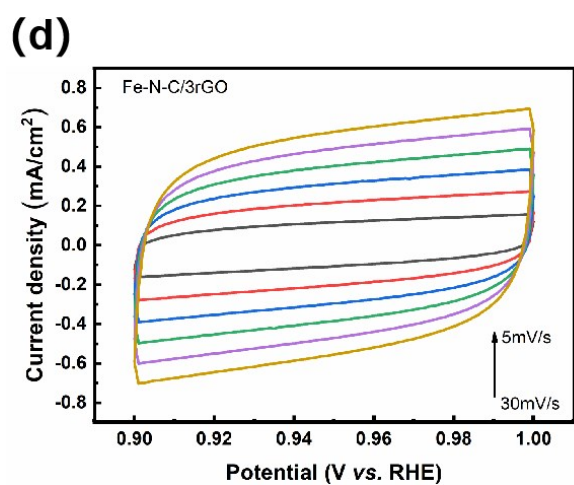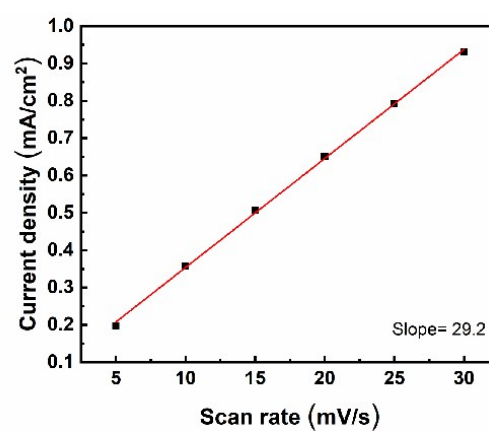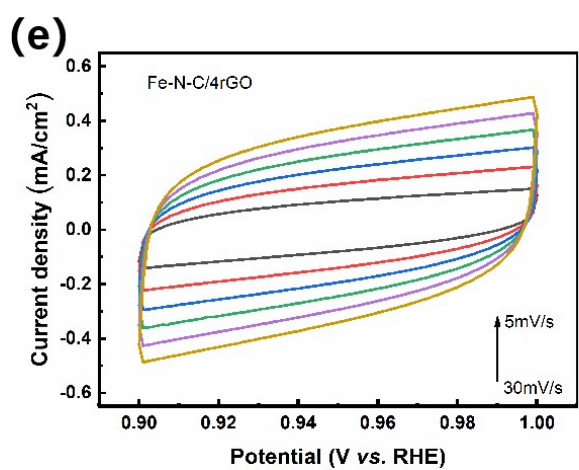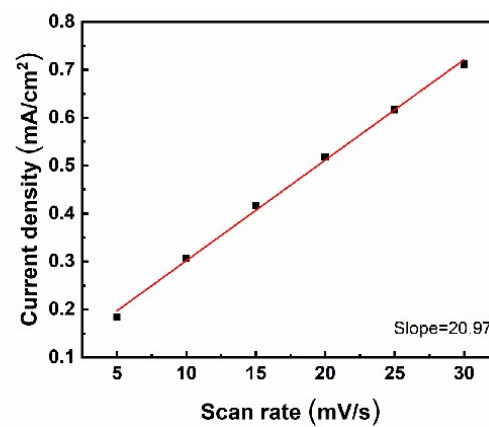

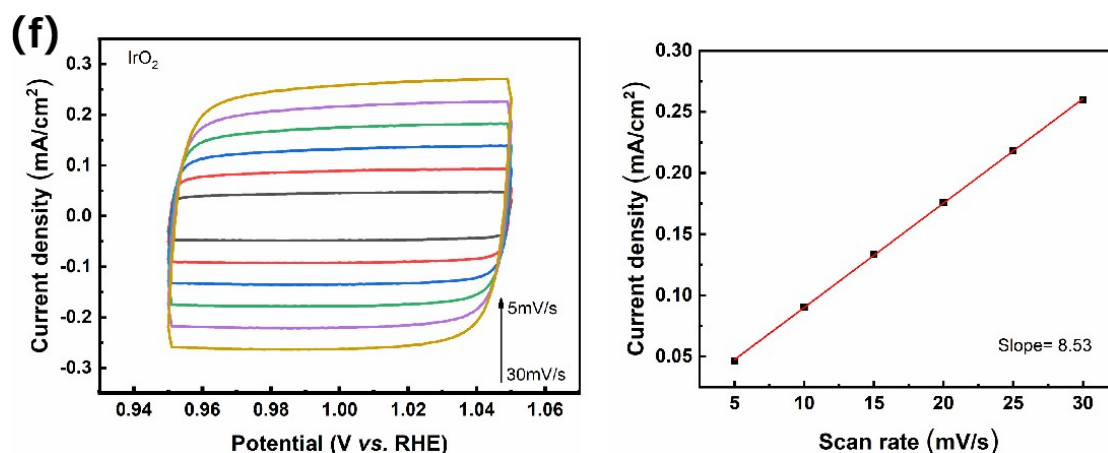

**Figure S6.** CV curves and the charging current density differences plotted against scan rates of (a) Fe-N-C, (b) Fe-N-C/rGO, (c) Fe-N-C/2rGO, (d) Fe-N-C/3rGO, (e) Fe-N-C/4rGO and (f) IrO<sub>2</sub> at various scan rates (5, 10, 15, 20, 25, and 30 mV s<sup>-1</sup>).

Calculation of ECAS: The calculation of electrochemically active surface area (ECAS) is estimated from the double layer capacitance ( $C_{dl}$ ) of the different catalysts in 1 M KOH based on the previous published report. The charging current ( $i_c$ ) was measured from the CVs at different scan rates. The relation between  $i_c$ , the scan rate ( $v$ ) and the  $C_{dl}$  was given in equation (1):  $i_c = vC_{dl}$ .

Therefore, the slope of  $i_c$  as a function of  $v$  is equal to  $C_{dl}$ . For the calculation of ECAS, the specific capacitance ( $C_s$ ) value is 0.040 mF cm<sup>-2</sup> in 1 M KOH. So the ECAS of is calculated according to equation (2):  $ECSA = C_{dl}/C_s$ .

The selected potential range was in non-Faradaic window.

**Table S1.** BET surface areas and Pore volume of the catalysts

| Samples     | V <sub>micro</sub> |       | V <sub>meso</sub>  |       | V <sub>macro</sub> |       | V <sub>total</sub> | S <sub>BET</sub>  |
|-------------|--------------------|-------|--------------------|-------|--------------------|-------|--------------------|-------------------|
|             | cm <sup>3</sup> /g | %     | cm <sup>3</sup> /g | %     | cm <sup>3</sup> /g | %     | cm <sup>3</sup> /g | m <sup>2</sup> /g |
| rGO         | 0.15               | 57.69 | 0.05               | 19.23 | 0.06               | 23.07 | 0.26               | 242               |
| Fe-N-C/2rGO | 0.37               | 46.84 | 0.32               | 40.51 | 0.10               | 12.65 | 0.79               | 571               |
| Fe-N-C      | 0.30               | 53.57 | 0.02               | 3.77  | 0.21               | 39.62 | 0.53               | 445               |

**Table S2.** Elemental quantification determined by XPS for different catalysts (at%).

| Samples     | C     | N    | O     | Fe   | Zn   |
|-------------|-------|------|-------|------|------|
| GO          | 73.17 | --   | 26.83 | --   | --   |
| rGO         | 92.94 | --   | 7.96  | --   | --   |
| Fe-N-C/2rGO | 93.59 | 3.18 | 2.7   | 0.38 | 0.15 |
| Fe-N-C      | 94.96 | 2.48 | 2.1   | 0.32 | 0.14 |

**Table S3.** The N1s spectra fitting results of catalysts of the Fe-N-C/2rGO and Fe-N-C(%).

| Samples     | Pyridinic-N/Fe-N <sub>x</sub> | Graphitic-N | Pyrrolic-N | Oxidized graphitic-N |
|-------------|-------------------------------|-------------|------------|----------------------|
| Fe-N-C      | 25.73                         | 35.88       | 21.38      | 17                   |
| Fe-N-C/2rGO | 38.18                         | 22.03       | 21.39      | 18.4                 |

**Table S4.** The Fe2p spectra fitting results of catalysts of the Fe-N-C/2rGO and Fe-N-C(%).

| Samples     | Fe2p3/2 | Fe 2p1/2 |
|-------------|---------|----------|
| Fe-N-C/2rGO | 65.10   | 34.90    |

|        |       |       |
|--------|-------|-------|
| Fe-N-C | 60.87 | 39.13 |
|--------|-------|-------|

**Table S5.** Elemental quantification of catalyst determined by ICP.

| Samples     | Fe (wt%) | Zn (wt%) |
|-------------|----------|----------|
| Fe-N-C/2rGO | 0.45     | 0.63     |
| Fe-N-C      | 0.43     | 0.71     |

**Table S6.** Summary of the catalytic activities of the reported composite electrocatalysts in 0.1 M KOH.

| Catalyst                                               | $E_{\text{onset}}$<br>(V vs RHE) | $E_{1/2}$<br>(V vs RHE) | $I_K$<br>(mA cm <sup>2</sup> )<br>vs RHE | $E_{j=10}$<br>(V vs RHE) | $\Delta E$<br>( $E_{j=10}-E_{1/2}$ )<br>(V vs RHE) | Battery<br>performancem<br>(mW cm <sup>-2</sup> ) | Ref.      |
|--------------------------------------------------------|----------------------------------|-------------------------|------------------------------------------|--------------------------|----------------------------------------------------|---------------------------------------------------|-----------|
| Fe-N-C/2rGO                                            | 0.99                             | 0.88                    |                                          | 1.56                     | 0.68                                               | 164                                               | This work |
| FeP/Fe <sub>2</sub> O <sub>3</sub> @NPCA               | 0.95                             | 0.838                   | 5.357                                    | 1.632                    | 0.794                                              | —                                                 | [9]       |
| Co-N <sub>x</sub> /C NRA                               | —                                | 0.877                   | —                                        | 1.53                     | 0.65                                               | 193.2                                             | [10]      |
| Co@N-CNT/rGO-0.1                                       | —                                | 0.82                    | —                                        | 1.69                     | 0.87                                               | 122                                               | [11]      |
| Co <sub>5.47</sub> N@N-rGO-750                         | —                                | 0.81                    | —                                        | 1.58                     | 0.77                                               | 120.7                                             | [12]      |
| Co <sub>3</sub> Fe <sub>7</sub> @Fe <sub>2</sub> N/rGO | 0.98                             | 0.89                    | —                                        | 1.6                      | 0.71                                               | —                                                 | [13]      |

|                                           |       |       |      |        |       |       |      |
|-------------------------------------------|-------|-------|------|--------|-------|-------|------|
| C-MOF-C2-900                              | ——    | 0.817 | ——   | 1.58 V | 0.763 | ——    | [14] |
| Fe/N-G-SAC                                | ——    | 0.89  | ——   | 1.67   | 0.78  | 120   | [15] |
| Fe-Nx-C                                   | 1.05  | 0.91  | 5.44 | 1.83   | 0.92  | 96.4  | [16] |
| S <sub>3</sub> N-Fe/N/C-CNT               | ——    | 0.85  | 6.68 | 1.6    | 0.75  | 102.7 | [17] |
| Fe-CN-CIG                                 | ——    | 0.84  | 5    | 1.67   | 0.83  | ——    | [18] |
| FeCoNx-CN                                 | 0.954 | 0.886 | 6.3  | 1.67   | 0.784 | 150   | [19] |
| Fe <sub>0.5</sub> Co <sub>0.5</sub> /NrGO | ——    | 0.85  | 5.25 | 1.63   | 0.78  | 86    | [20] |
| Fe-Nx-PNC                                 | 0.997 | 0.86  | 6    | 1.63   | 0.77  | 118   | [21] |

## References:

- [1] W.S. Hummers, R.E. Offeman, Journal of the American Chemical Society 80 (1958) 1339-1339.
- [2] L. Han, X. Lu, M. Wang, D. Gan, W. Deng, K. Wang, L. Fang, K. Liu, C.W. Chan, Y. Tang, Small 13 (2017) 1601916.
- [3] F. Luo, K. Wu, J. Shi, X. Du, X. Li, L. Yang, M. Lu, Journal of Materials Chemistry 5 (2017) 18542-18550.
- [4] D.C. Marcano, D.V. Kosynkin, J.M. Berlin, A. Sinitskii, Z. Sun, A. Slesarev, L.B. Alemany, W. Lu, J.M. Tour, Acs Nano 4 (2010) 4806.
- [5] D. Li, M.B. Muller, S. Gilje, R.B. Kaner, G.G. Wallace, Nature Nanotechnology 3 (2008) 101-105.
- [6] S. M. Kang, S. Park, D. Kim, S. Y. Park, R. S. Ruoff, H. Lee, Advanced Functional Materials 21 (2011) 108-112.
- [7] H. Zhang, S. Hwang, M. Wang, Z. Feng, S. Karakalos, L. Luo, Z. Qiao, X. Xie, C. Wang, D. Su, Journal of the American Chemical Society 139 (2017) 14143-14149.
- [8] Y. He, S. Hwang, D.A. Cullen, M.A. Uddin, L. Langhorst, B. Li, S. Karakalos, A.J. Kropf, E.C. Wegener, J. Sokolowski, Energy & Environmental Science 12 (2019) 250-260.
- [9] K. Wu, L. Zhang, Y. Yuan, L. Zhong, Z. Chen, X. Chi, H. Lu, Z. Chen, R. Zou, T. Li, C. Jiang, Y. Chen, X. Peng, J. Lu, Advanced Materials, 32 (2020)2002292.

- [10] I.S. Amiinu, X. Liu, Z. Pu, WenqiangLi, S. Mu, *Advanced Functional Materials* 28 (2018) 1704638.
- [11] X. Peng, L. Wei, Y. Liu, T. Cen, D. Yuan, *Energy & Fuels* 34 (2020).
- [12] X.S. A, S.C. A, S.C. A, W.P. B, J.Z. A, *Carbon* 157 (2020) 234-243.
- [13] D. Liang, H. Zhang, X. Ma, S. Liu, T. Huang, *Materials Today Energy* 17 (2020) 100433.
- [14] M. Zhang, Q. Dai, H. Zheng, M. Chen, L. Dai, *Advanced Materials* 30 (2018) 1705431.
- [15] M. Xiao, Z. Xing, Z. Jin, C. Liu, J. Ge, J. Zhu, Y. Wang, X. Zhao, Z. Chen, *Advanced Materials* 32 (2020) 2004900.
- [16] J. Han, X. Meng, L. Lu, J. Bian, Z. Li, C. Sun, *Advanced Functional Materials* 29 (2019) 1808872.
- [17] P. Chen, T. Zhou, L. Xing, K. Xu, Y. Tong, H. Xie, L. Zhang, W. Yan, W. Chu, C. Wu, Y. Xie, *Angewandte Chemie International Edition* 56 (2017) 1-6.
- [18] D. P. He, Y. L. Xiong, J. L. Yang, X. Chen, Z. X. Deng, M. Pan, Y. D. Li, S. C. Mu, *Journal of Materials Chemistry A* 5(2017) 1930.
- [19] S. Li, C. Cheng, X. J. Zhao, J. Schmidt, A. Thomas, *Angewandte Chemie International Edition* 57(2018) 1856.
- [20] L. Wei, H.E. Karahan, S. Zhai, H. Liu, X. Chen, Z. Zhou, Y. Lei, Z. Liu, Y. Chen, *Advanced Materials* 29 (2017) 1701410.
- [21] L. Ma, S. Chen, Z. Pei, Y. Huang, G. Liang, F. Mo, Q. Yang, J. Su, Y. Gao, J.A. Zapien, *ACS Nano* (2018) (2018) 1949.
